# Supplementary material for: Biocide, antifungal susceptibility and virulence characteristics of Clade 1 Candidozyma auris strains
Source: Ann Clin Microbiol Antimicrob. 2025 Sep 30;24:55. doi: 10.1186/s12941-025-00821-8 (PMC12482617; doi:10.1186/s12941-025-00821-8)
Supplement: Supplementary file 1 — Supplementary Material 1. [file 12941_2025_821_MOESM1_ESM.xlsx]

## Sheet: Virulence Distribution
	Negative	Positive
Slime Factor (Tube)	0	47
Slime Factor (MTT)	0	47
SAP	0	47
Casein	45	2
Phospholipase	47	0
Esterase	6	41
Hemolysis	0	47

## Sheet: Biocide MIC Stats
	MIC50	MIC90	Min MIC	Max MIC	Range
TRC	0.25	0.25	0.25	4	3.75
BNZ	16	16	16	32	16
CHX	0.5	0.5	0.5	2	1.5
CHLOR	0.01	0.02	0.001	0.06	0.059

## Sheet: Biocide ECOFF
	ECOFF
TRC	0.4625
BNZ	32
CHX	1.85
CHLOR	0.05

## Sheet: AF Resistance Summary
	Resistant	Susceptible
AMPHO	2	45
FLU	15	32
CASPO	0	47

## Sheet: AF MIC50_MIC90
	MIC50	MIC90
AMPHO	0.5	1
FLU	16	32
CASPO	0.125	0.25
						MIC50	MIC90	ECOFF
					AMPHO	0.5	1	2
					VORI	2	8	8
					FLU	16	32	32
					ITRA	1	2	2
					POSA	0.25	0.5	0.5
					CASPO	0.125	0.25	0.5
					ISAVU	0.125	0.5	1
